# Supplementary material for: Microfluidic synthesis of monodispersed sharp emitting perovskite CsPbBr 3 quantum dots via multidimensional parameterization
Source: Royal Society of Chemistry journal article supplement (doi:10.1039/d4tc04104f), 2024-11-04
Supplement: d4tc04104f1.pdf [file d4tc04104f1.pdf]

## Supplementary Information

# Microfluidic synthesis of monodispersed sharp emitting perovskite CsPbBr<sub>3</sub> quantum dots via multidimensional parameterization

Yunhao Ning<sup>a</sup>, Shuo Guan<sup>a</sup>, Chuantong Cheng<sup>b,c\*</sup>, Bao Zhang<sup>a\*</sup>

Bingyu Qin<sup>b</sup> and Beiju Huang<sup>b,c</sup>

<sup>a</sup> School of Chemical Engineering and Technology, Tianjin University, Tianjin 300350, People's Republic of China

<sup>b</sup> Key Laboratory of Optoelectronic Materials and Devices, Institute of Semiconductors, CAS, Chinese Academy of Sciences, Beijing 100083, People's Republic of China

<sup>c</sup> College of Materials Science and Optoelectronic Technology, University of Chinese Academy of Sciences, Beijing 100049, People's Republic of China

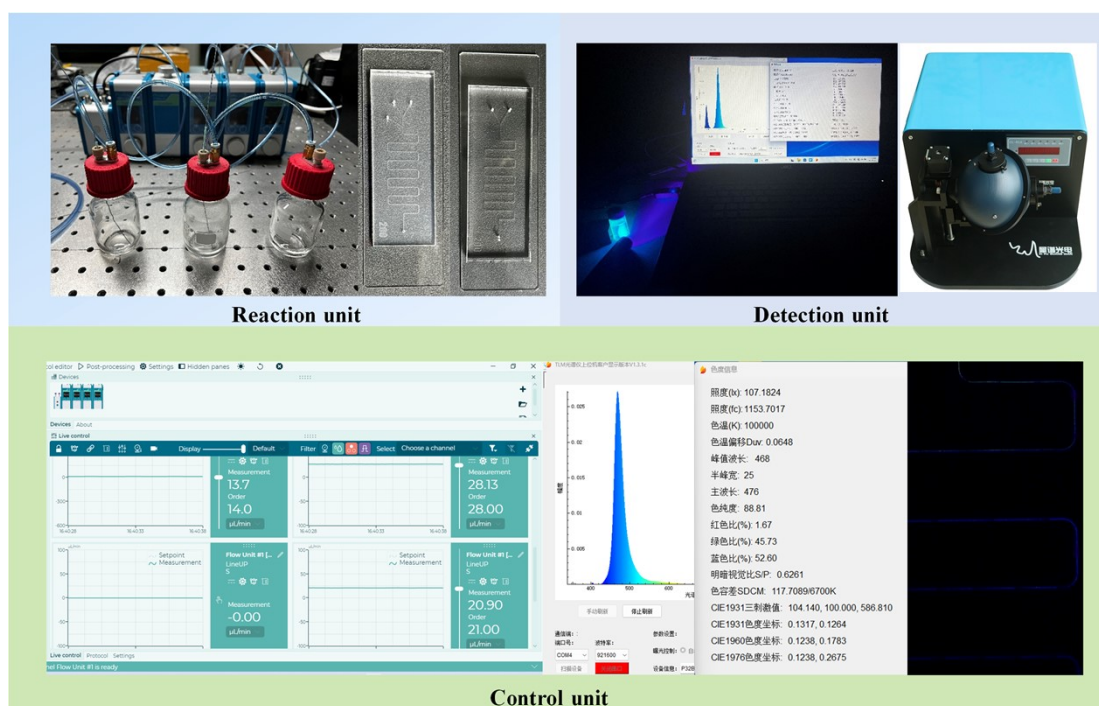

Figure S1. Microfluidic system including reaction unit, detection unit and control unit.

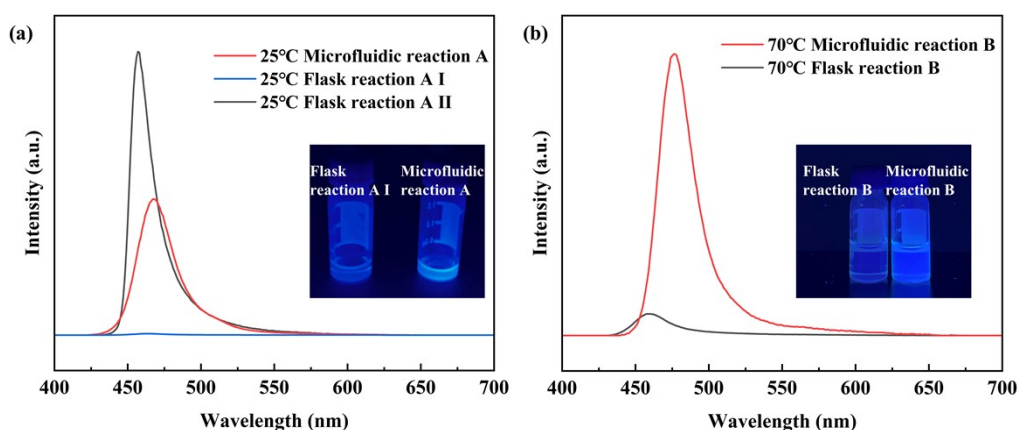

Figure S2 (a), (b) PL spectra and photograph under UV light of synthesized CsPbBr<sub>3</sub> QDs from batch and microfluidic reactor.

Table S1 PL emission wavelength, FWHM and PLQY of CsPbBr<sub>3</sub> QDs from batch and Microfluidic reactors under different conditions of reaction time and temperature.

|                  | Microfluidic reaction A | Flask reaction A I | Flask reaction A II | Microfluidic reaction B | Flask reaction B |
|------------------|-------------------------|--------------------|---------------------|-------------------------|------------------|
| Temperature/(°C) | 25                      | 25                 | 25                  | 70                      | 70               |
| Reaction time    | 56.8s                   | 10s                | 26h                 | 2.7s                    | 10s              |
| Wavelength/(nm)  | 467                     | 464                | 457                 | 477                     | 460              |
| FHWM/(nm)        | 28                      | 25                 | 18                  | 28                      | 28               |
| PLQY/(%)         | 21.67%                  | 2.96%              | 20.47%              | 32.89%                  | 4.59%            |

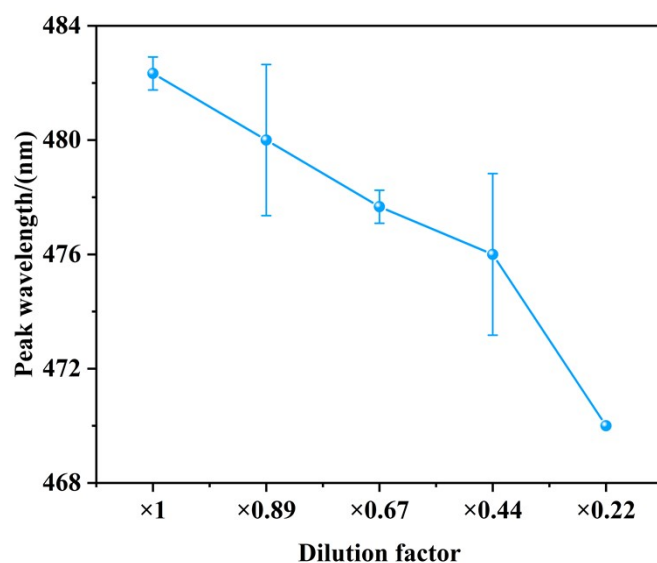

Figure S3 PL emission wavelength of different dilution factors.

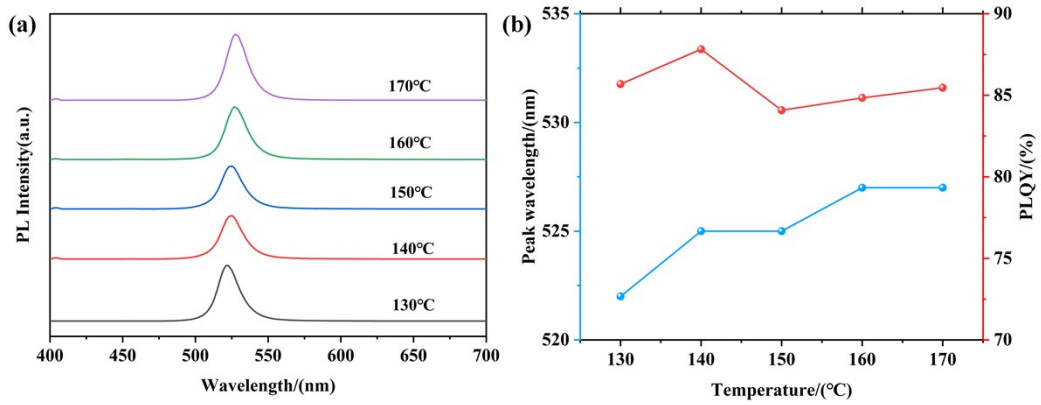

Figure S4 (a) PL spectra, (b) PL emission wavelength and PLQY of samples with different temperatures.

Table S2 PL emission wavelength, FWHM and PLQY of CsPbBr<sub>3</sub> QDs with different temperatures.

| T/(°C)    | 130   | 140   | 150   | 160   | 170   |
|-----------|-------|-------|-------|-------|-------|
| PL/(nm)   | 522   | 525   | 525   | 527   | 527   |
| PLQY/(%)  | 85.68 | 87.82 | 84.08 | 84.84 | 85.46 |
| FWHM/(nm) | 17    | 17    | 18    | 17    | 17    |

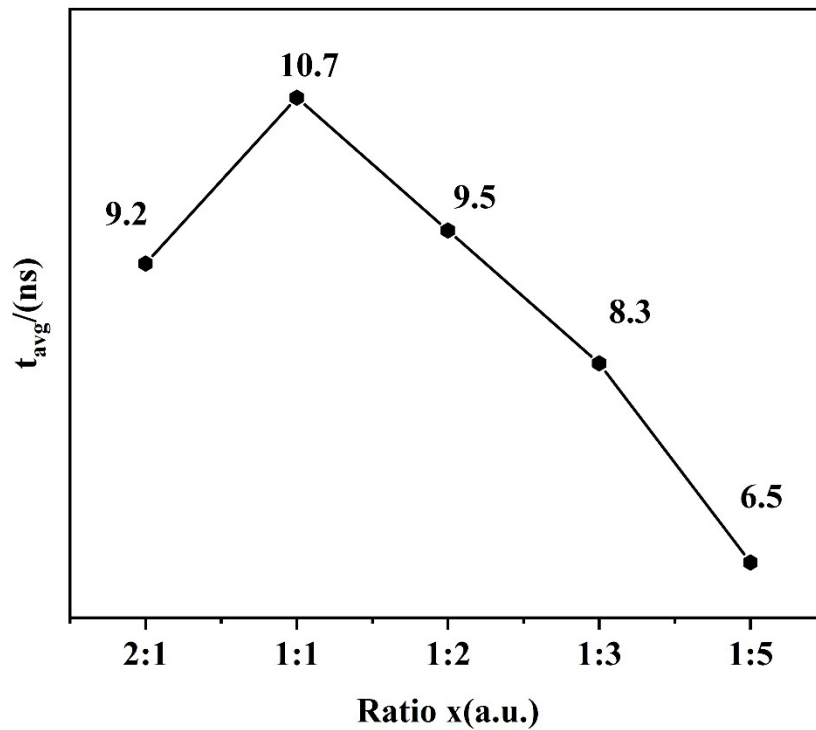

Figure S5 The average lifetimes of samples with different Cs/Pb (x) ratio.

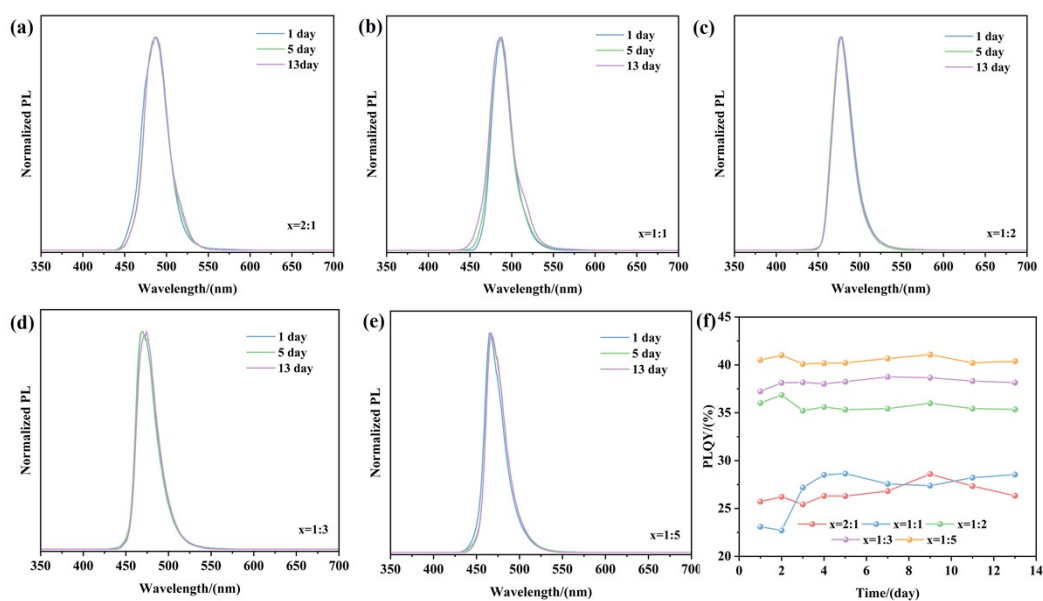

Figure S6 (a-e) PL spectrum and (f) PLQY values of samples with different ratios of Cs/Pb (x) in a constant temperature and humidity of  $20 \pm 5$  °C and  $25 \pm 5\%$ .

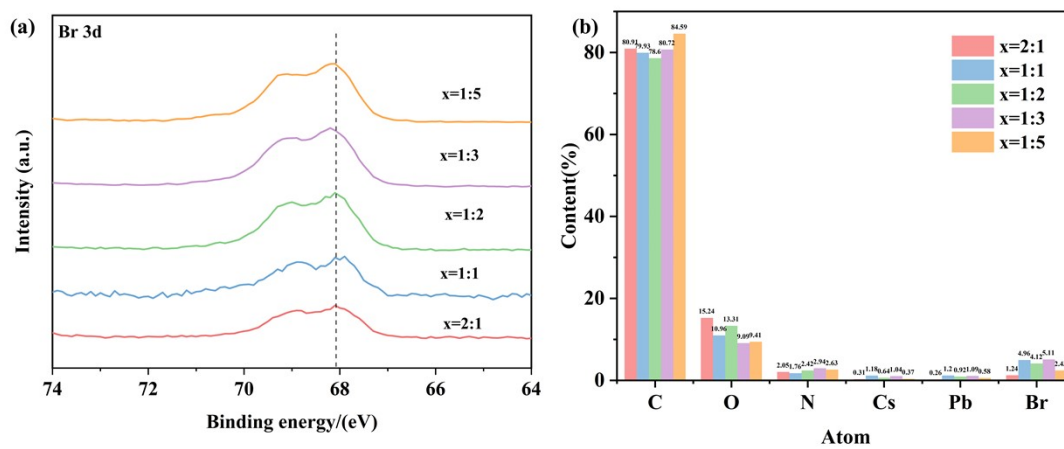

Figure S7 (a) XPS spectra of Br 3d. (b) Relative element content of samples with different ratios of Cs/Pb (x).

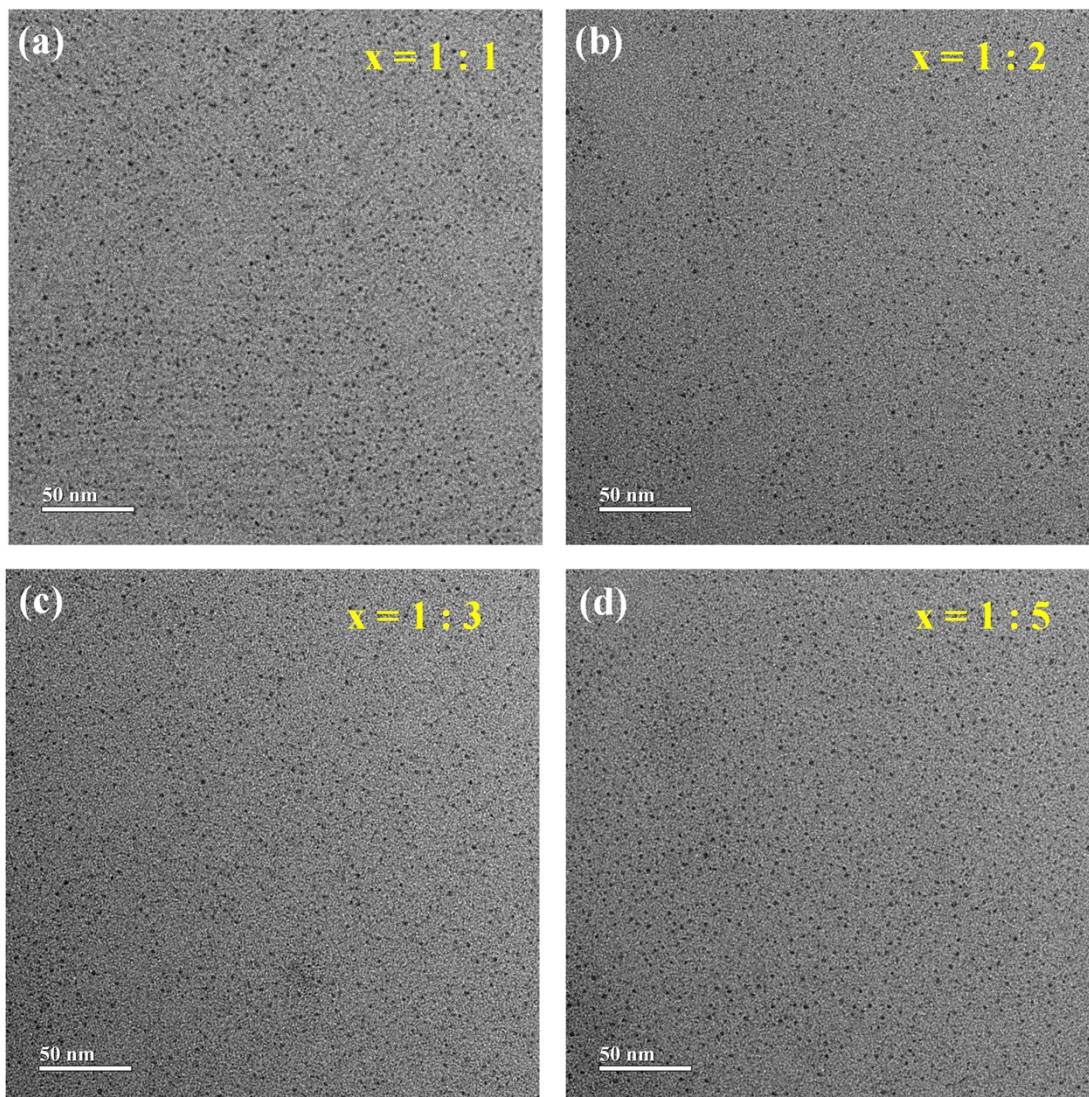

Figure S8. TEM images of different ratios Cs/Pb (x). (A) x = 1: 1, (B) x = 1: 2, (C) x = 1: 3, (D) x = 1: 5. Other parameters were OA/OAm = 2 and same reaction time.

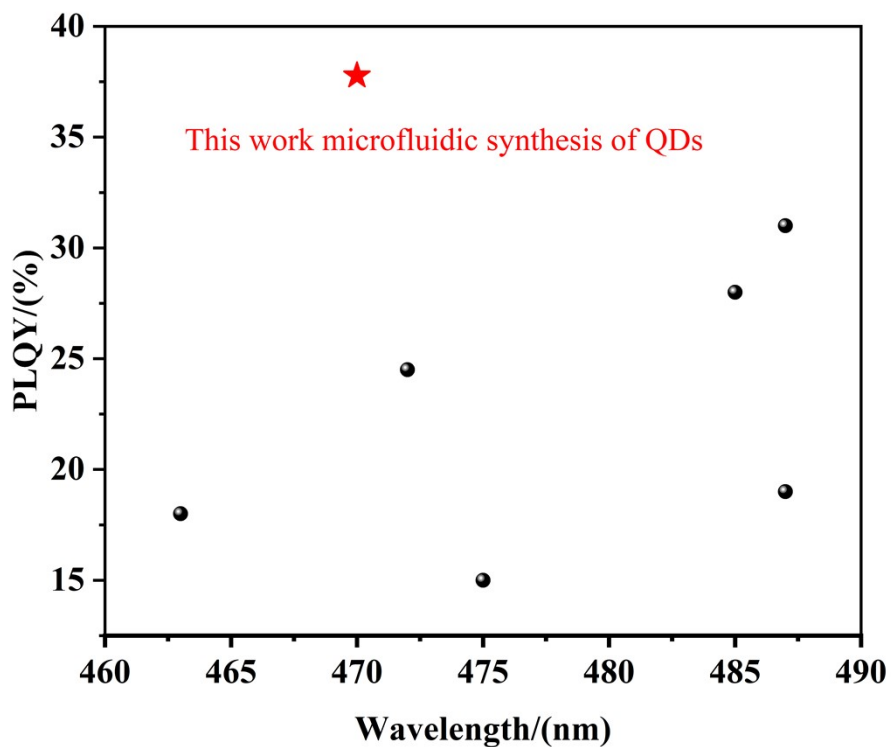

Figure S9 PLQY of the microfluidic chip synthesized QDs comparing with other literature studies without intentional passivation (see Table S3 for references).

Table S3 PLQY data and references shown

| PL Peak position/(nm) | PLQY/(%) | Ref.      |
|-----------------------|----------|-----------|
| 463                   | 18       | 1         |
| 470                   | 37.77    | This work |
| 472                   | 24.5     | 2         |
| 475                   | 15       | 3         |
| 485                   | 28       | 3         |
| 487                   | 19       | 4         |
| 487                   | 31       | 5         |

Table S4 PL emission wavelength (nm), PLQY and FWHM of the CsPbBr<sub>3</sub> QD samples obtained with different temperatures.

| T/(°C)    | 30    | 40   | 50    | 60   | 70    | 80    | 90    | 100   | 110   | 120   | 130   |
|-----------|-------|------|-------|------|-------|-------|-------|-------|-------|-------|-------|
| PL/(nm)   | 463   | 463  | 467   | 469  | 474   | 478   | 483   | 492   | 503   | 512   | 522   |
| PLQY/(%)  | 14.56 | 7.44 | 22.21 | 21.7 | 32.30 | 39.42 | 47.82 | 50.43 | 63.34 | 72.36 | 85.68 |
| FWHM/(nm) | 28    | 27   | 29    | 27   | 30    | 31    | 34    | 31    | 27    | 23    | 17    |

Table S5 PL emission wavelength (nm) and PLQY of the samples with different ratios of Cs/Pb (x).

| x        | 5:1   | 2:1   | 1:1   | 1:2   | 1:3   | 1:5   |
|----------|-------|-------|-------|-------|-------|-------|
| PL/(nm)  | 469.0 | 478.3 | 478.5 | 476.7 | 472.7 | 471.5 |
| PLQY/(%) | 2.76  | 27.97 | 29.60 | 36.39 | 37.36 | 41.87 |

## References

1. D. Bothe, C. Stemich and H.-J. Warnecke, *Chem. Eng. Sci.*, 2006, **61**, 2950-2958.
2. K. Zhang, Y. Gao, B. Pinho, R. L. Z. Hoye, S. D. Stranks and L. Torrente-Murciano, *Chem. Eng. J.*, 2023, **451**.
3. B. J. Bohn, Y. Tong, M. Gramlich, M. L. Lai, M. Doblinger, K. Wang, R. L. Z. Hoye, P. Muller-Buschbaum, S. D. Stranks, A. S. Urban, L. Polavarapu and J. Feldmann, *Nano Lett.*, 2018, **18**, 5231-5238.
4. Q. Wang, X. Wang, Z. Yang, N. Zhou, Y. Deng, J. Zhao, X. Xiao, P. Rudd, A. Moran, Y. Yan and J. Huang, *Nat. Commun.*, 2019, **10**, 5633.
5. B. Pinho, K. Zhang, R. L. Z. Hoye and L. Torrente-Murciano, *Adv. Opt. Mater.*, 2022, **10**.
